# Supplementary material for: The Impact of Treatment for Smoking on Breast Cancer Patients’ Survival
Source: Cancers (Basel). 2022 Mar 12;14(6):1464. doi: 10.3390/cancers14061464 (PMC8946483; doi:10.3390/cancers14061464)
Supplement: Supplementary file 1 [file cancers-14-01464-s001.zip › cancers-1604789-supplementary.pdf]

Article

# The Impact of Treatment for Smoking on Breast Cancer Patients' Survival

Akshara Singareeka Raghavendra <sup>1</sup>, George Kypriotakis <sup>2</sup>, Maher Karam-Hage <sup>2,3</sup>, Seokhun Kim <sup>2</sup>, Mazen Jizzini <sup>4</sup>, Kareem S. Seoudy <sup>5</sup>, Jason D. Robinson <sup>2</sup>, Carlos H. Barcenas <sup>1</sup>, Paul M. Cinciripini <sup>2</sup>, Debu Tripathy <sup>1</sup> and Nuha K. Ibrahim <sup>1,\*</sup>

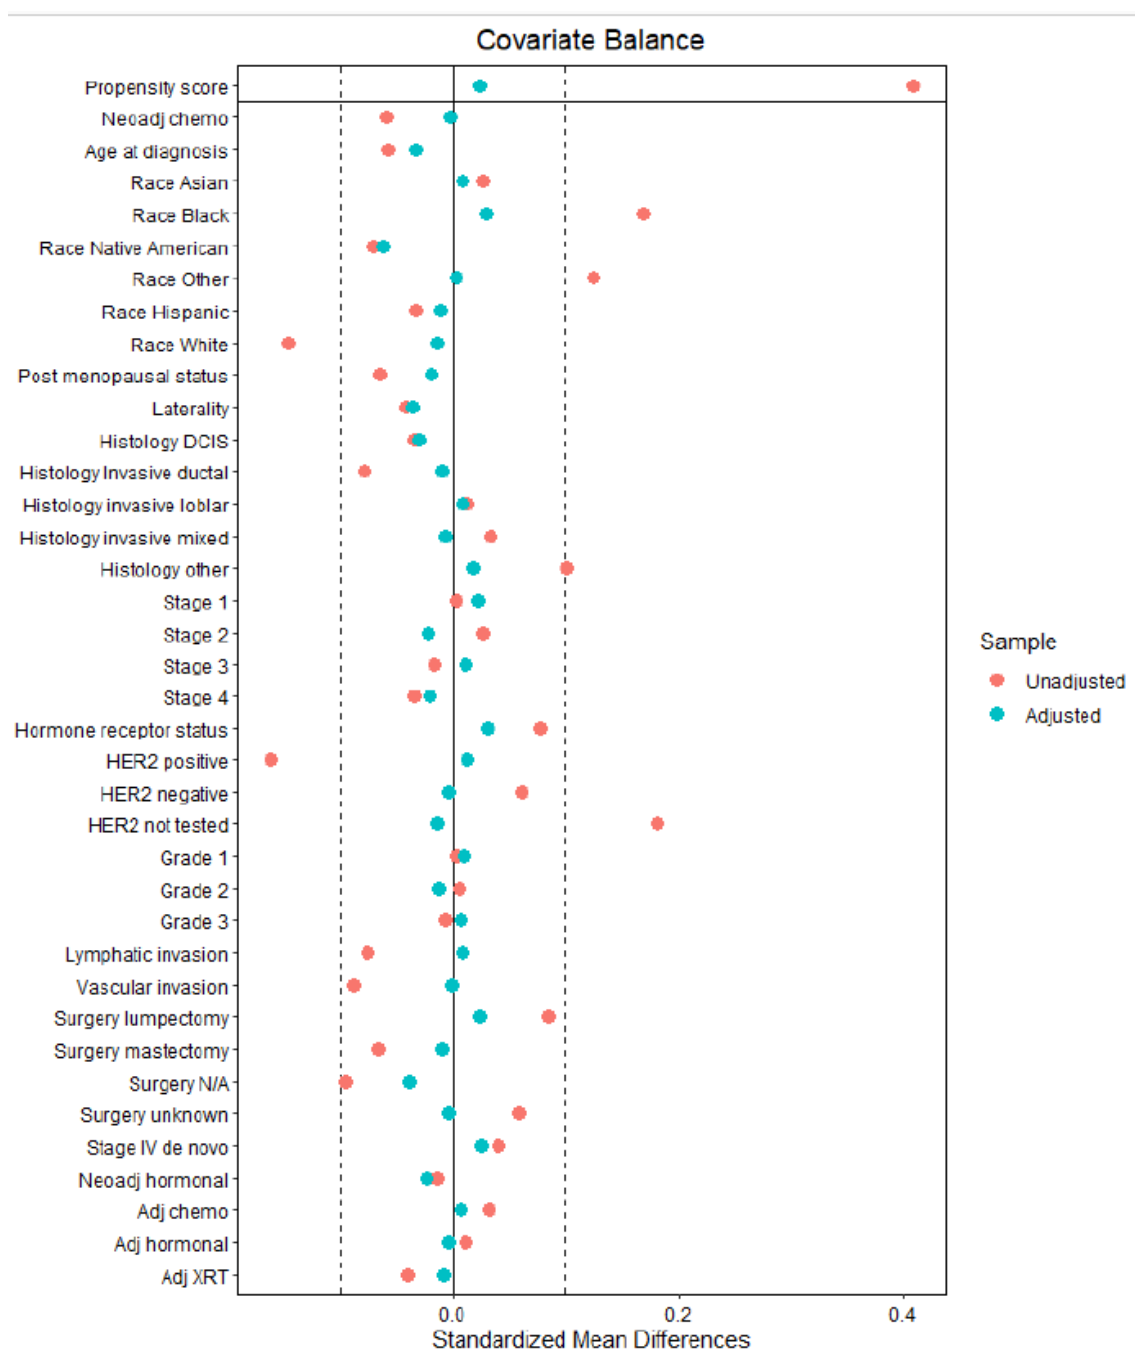

**Figure S1.** Covariate balance – Standardized Mean Differences.

**Table S1.** Covariate balance between 2 groups.

|                                                                     |                 |                  |                     |
|---------------------------------------------------------------------|-----------------|------------------|---------------------|
| Diff. Un = Unadjusted standardized mean difference before weighting |                 |                  |                     |
| Diff. Adj = Adjusted standardized mean difference after weighting   |                 |                  |                     |
| <b>Balance Measures</b>                                             | <b>Diff. Un</b> | <b>Diff. Adj</b> | <b>M. Threshold</b> |
| Age at diagnosis                                                    | -0.0588         | -0.0338          | Balanced, <0.1      |
| Race Asian                                                          | 0.0256          | 0.008            | Balanced, <0.1      |
| Race Black                                                          | 0.1684          | 0.029            | Balanced, <0.1      |
| Race native American                                                | -0.0704         | -0.0622          | Balanced, <0.1      |
| Race Other                                                          | 0.1242          | 0.0028           | Balanced, <0.1      |
| Race Hispanic                                                       | -0.0335         | -0.0106          | Balanced, <0.1      |
| Race White                                                          | -0.147          | -0.0141          | Balanced, <0.1      |
| Post-menopausal status                                              | -0.0646         | -0.0201          | Balanced, <0.1      |
| Laterality                                                          | -0.0417         | -0.0356          | Balanced, <0.1      |
| Histology - DCIS                                                    | -0.0352         | -0.0311          | Balanced, <0.1      |
| Histology - Invasive ductal                                         | -0.0795         | -0.0105          | Balanced, <0.1      |
| Histology - Invasive lobular                                        | 0.0127          | 0.0083           | Balanced, <0.1      |
| Histology - Invasive mixed ductal/lobular                           | 0.0331          | -0.0064          | Balanced, <0.1      |
| Histology - Other                                                   | 0.1008          | 0.0176           | Balanced, <0.1      |
| Overall stage 1                                                     | 0.0024          | 0.0226           | Balanced, <0.1      |
| Overall stage 2                                                     | 0.0265          | -0.0219          | Balanced, <0.1      |
| Overall stage 3                                                     | -0.0161         | 0.0113           | Balanced, <0.1      |
| Overall stage 4                                                     | -0.0341         | -0.0206          | Balanced, <0.1      |
| Hormone receptor status                                             | 0.0774          | 0.0303           | Balanced, <0.1      |

|                                            |                |         |                |
|--------------------------------------------|----------------|---------|----------------|
| HER2 Positive                              | -0.162         | 0.0125  | Balanced, <0.1 |
| HER2 Negative                              | 0.0606         | -0.0047 | Balanced, <0.1 |
| Not tested                                 | 0.1805         | -0.0138 | Balanced, <0.1 |
| Grade 1                                    | 0.0021         | 0.0091  | Balanced, <0.1 |
| Grade 2                                    | 0.0057         | -0.0125 | Balanced, <0.1 |
| Grade 3                                    | -0.007         | 0.0071  | Balanced, <0.1 |
| Lymphatic invasion                         | -0.0757        | 0.0075  | Balanced, <0.1 |
| Vascular invasion                          | -0.088         | -0.002  | Balanced, <0.1 |
| Surgery- Lumpectomy                        | 0.0841         | 0.0236  | Balanced, <0.1 |
| Surgery- Mastectomy                        | -0.067         | -0.0097 | Balanced, <0.1 |
| Surgery- N/A(stage IV/not done)            | -0.0951        | -0.0393 | Balanced, <0.1 |
| Surgery- Unknown                           | 0.0574         | -0.0046 | Balanced, <0.1 |
| Stage IV denovo                            | 0.0395         | 0.0253  | Balanced, <0.1 |
| Neoadjuvant chemotherapy                   | -0.0603        | -0.0027 | Balanced, <0.1 |
| Neoadjuvant hormonal                       | -0.0135        | -0.024  | Balanced, <0.1 |
| Adjuvant chemotherapy                      | 0.0322         | 0.0062  | Balanced, <0.1 |
| Adjuvant hormonal                          | 0.0103         | -0.0047 | Balanced, <0.1 |
| Adjuvant radiation (XRT)                   | -0.0403        | -0.0089 | Balanced, <0.1 |
| Balance tally for mean differences         |                |         |                |
|                                            | count          |         |                |
| Balanced, <0.1                             | 38             |         |                |
| Not Balanced, >0.1                         | 0              |         |                |
| Variable with the greatest mean difference |                |         |                |
| Variable Diff. Adj M. Threshold            |                |         |                |
| Race - Native American -0.0622             | Balanced, <0.1 |         |                |

**Table S2.** Demographic and disease characteristics of study subjects by survival status.

| Characteristic                 | Alive with no evidence of disease<br>No. (%)<br>(n = 1503) | Dead with disease<br>No. (%)<br>(n = 326) | <i>P</i> |
|--------------------------------|------------------------------------------------------------|-------------------------------------------|----------|
| Abstinence status              |                                                            |                                           | 0.0768   |
| Yes                            | 179 (11.91)                                                | 34 (10.43)                                |          |
| No                             | 1,324 (88.09)                                              | 292 (89.57)                               |          |
| Race                           |                                                            |                                           | 0.0181   |
| White                          | 1,123 (74.72)                                              | 237 (72.70)                               |          |
| Black                          | 176 (11.71)                                                | 54 (16.56)                                |          |
| Hispanic                       | 163 (10.84)                                                | 25 (7.67)                                 |          |
| Asian                          | 24 (1.60)                                                  | 5 (1.53)                                  |          |
| Native American                | 2 (0.13)                                                   | 2 (0.61)                                  |          |
| Other                          | 15 (1.00)                                                  | 3 (0.92)                                  |          |
| TP participation               |                                                            |                                           | 0.048    |
| Yes                            | 474 (31.54)                                                | 106 (32.52)                               |          |
| No                             | 1029 (68.46)                                               | 220 (67.48)                               |          |
| Stage                          |                                                            |                                           | < 0.001  |
| I                              | 562 (37.39)                                                | 29 (8.90)                                 |          |
| II                             | 640 (42.58)                                                | 95 (29.14)                                |          |
| III                            | 285 (18.96)                                                | 120 (36.81)                               |          |
| IV                             | 16 (1.06)                                                  | 82 (25.15)                                |          |
| Hormone receptor status        |                                                            |                                           | 0.010    |
| Positive                       | 1,190 (79.17)                                              | 221 (67.79)                               |          |
| Negative                       | 313 (20.83)                                                | 105 (32.21)                               |          |
| HER2                           |                                                            |                                           | 0.0069   |
| Positive                       | 250 (16.63)                                                | 47 (14.42)                                |          |
| Negative                       | 1,223 (81.37)                                              | 269 (82.52)                               |          |
| Not tested                     | 30 (2.00)                                                  | 10 (3.07)                                 |          |
| Menopausal status at diagnosis |                                                            |                                           | 0.1590   |
| Pre                            | 619 (41.18)                                                | 153 (46.93)                               |          |
| Post                           | 884 (58.82)                                                | 173 (53.07)                               |          |
| Neoadjuvant chemotherapy       |                                                            |                                           | < 0.001  |
| Yes                            | 520 (34.60)                                                | 129 (39.57)                               |          |
| No                             | 983 (65.40)                                                | 197 (60.43)                               |          |
| Neoadjuvant hormonal           |                                                            |                                           | 0.9204   |
| Yes                            | 42 (2.79)                                                  | 6 (1.84)                                  |          |
| No                             | 1,461 (97.21)                                              | 320 (98.16)                               |          |
| Adjuvant chemotherapy          |                                                            |                                           | < 0.001  |
| Yes                            | 560 (37.26)                                                | 92 (28.22)                                |          |
| No                             | 943 (62.74)                                                | 234 (71.78)                               |          |
| Adjuvant hormonal              |                                                            |                                           | < 0.001  |
| Yes                            | 1,068 (71.06)                                              | 117 (35.89)                               |          |
| No                             | 435 (28.94)                                                | 209 (64.11)                               |          |
| Adjuvant Radiation (XRT)       |                                                            |                                           | < 0.001  |
| Yes                            | 981 (65.27)                                                | 156 (47.85)                               |          |

|                                |               |               |         |
|--------------------------------|---------------|---------------|---------|
| No                             | 522 (34.73)   | 170 (52.15)   |         |
| Grade                          |               |               | < 0.001 |
| I                              | 163 (10.84)   | 24 (7.36)     |         |
| II                             | 718 (47.77)   | 128 (39.26)   |         |
| III                            | 622 (41.38)   | 174 (53.37)   |         |
| Laterality                     |               |               | 0.8978  |
| Right                          | 722 (48.04)   | 155 (47.55)   |         |
| Left                           | 781 (51.96)   | 171 (52.45)   |         |
| Histology                      |               |               | 0.0095  |
| Invasive ductal                | 1,272 (84.63) | 271 (83.13)   |         |
| Invasive lobular               | 116 (7.72)    | 33 (10.12)    |         |
| Invasive mixed ductal/lobular  | 65 (4.32)     | 10 (3.07)     |         |
| Other                          | 50 (3.33)     | 12 (3.68)     |         |
| Lymphatic invasion             |               |               | < 0.001 |
| Positive                       | 275 (18.30)   | 104 (31.90)   |         |
| Negative                       | 1,228 (81.70) | 222 (68.10)   |         |
| Vascular invasion              |               |               | < 0.001 |
| Positive                       | 270 (17.96)   | 101 (30.98)   |         |
| Negative                       | 1,233 (82.04) | 225 (69.02)   |         |
| Surgery type                   |               |               | < 0.001 |
| Lumpectomy                     | 686 (45.64)   | 79 (24.23)    |         |
| Mastectomy                     | 805 (53.56)   | 177 (54.29)   |         |
| N/A (stage IV/not done)        | 6 (0.40)      | 53 (16.26)    |         |
| Unknown                        | 6 (0.40)      | 17 (5.21)     |         |
| Stage IV de novo               |               |               | < 0.001 |
| Yes                            | 17 (1.13)     | 82 (25.15)    |         |
| No                             | 1,486 (98.87) | 244 (74.85)   |         |
| Age at diagnosis, y, mean (SD) | 51.34 (10.74) | 49.67 (10.94) | 0.419   |

Abbreviations: DCIS, ductal carcinoma in situ; LCIS, lobular carcinoma in situ; TP, Tobacco Treatment Program; XRT, radiotherapy.
